# Supplementary material for: Antibiotic prescriptions and risk factors for antimicrobial resistance in patients hospitalized with urinary tract infection: a matched case-control study using the French health insurance database (SNDS)
Source: PubMed Central journal article supplement (PMC8201676; doi:10.1186/s12879-021-06287-1), 2021-06-14
Supplement: 12879_2021_6287_MOESM1_ESM.pdf [file 12879_2021_6287_MOESM1_ESM.pdf]

Additional file 1

Antibiotic prescriptions and risk factors for antimicrobial resistance in patients hospitalized with urinary tract infection: A Matched Case-Control Study using the French health insurance database (SNDS).

Marion Opatowski<sup>a,b</sup>, Christian Brun-Buisson<sup>a,b</sup>, Mehdi Touat<sup>a,b</sup>, Jérôme Salomon<sup>a,b,c</sup>, Didier Guillemot<sup>a,b,c</sup>, Philippe Tuppin<sup>d</sup>, Laurence Watier<sup>a,b</sup>

<sup>a</sup>Epidemiology and Modeling of bacterial Evasion to Antibacterials Unit (EMEA), Institut Pasteur, 25–28, rue du Dr. Roux, 75724 Paris Cedex 15, France

<sup>b</sup>Center for Research in Epidemiology and Population Health (CESP), INSERM U1018, Paris-Saclay University, UVSQ, Montigny-Le-Bretonneux, France.

<sup>c</sup>AP-HP, Paris Saclay, Public Health, Medical Information, Clinical Research, Le Kremlin-Bicêtre, France.

<sup>d</sup>French National Health Insurance (Cnam), 50 avenue du Pr-André-Lemierre, 75986 Paris Cedex 20, France

Corresponding author:

Laurence Watier

Epidemiology and Modeling of bacterial Evasion to Antibacterials Unit

INSERM CESP U1018 / UVSQ / Institut Pasteur

25–28, rue du Dr. Roux, 75724 Paris Cedex 15, France

Email: [laurence.watier@inserm.fr](mailto:laurence.watier@inserm.fr)

Telephone number: +33 1 45 68 83 01

## Table of Contents:

- A. Supplement S1: Database description and patient selection
- B. Table S1: ICD-10 codes used
- C. Table S2: Selected bacteria included and associated resistance markers
- D. Supplement S2: Algorithms for identification of risk factors
  - 1. Antibiotic exposure
  - 2. Non-hospitalized urinary tract infection
  - 3. Specific urinary tract disease
  - 4. Urinary tract surgical procedures
  - 5. Diabetes
  - 6. Immunosuppression
    - a. HIV or AIDS
    - b. Active cancer
  - 7. Pregnancy
  - 8. Previous hospitalization in intensive care unit
- E. Table S3: Code list for definition of potential risk factors
- F. Table S4: Conditional univariate logistic regression: Risk factors of having a community-acquired or healthcare-associated urinary tract infection caused by a resistant bacterium compared with a susceptible one, by gender.
- G. Table S5: Number of antibiotic dispensing during the previous 3 months
- H. Table S6. Characteristics of patients excluded and included for analysis of association between antibiotic classes and resistant-bacterial acquisition
- I. References

#### A. Supplement S1: Database description and patient selection

The PMSI database covers all hospital stays in French publicly funded and private hospitals. It is the French national hospital discharge database, updated annually and used for reimbursement purposes. Therefore, each hospitalization record is standardized, following the Technical Agency for Hospital Information (ATIH) recommendations. It contains hospital diagnoses and medical procedures performed during each stay. Diagnoses are coded as principal diagnosis (PD: condition requiring hospitalization), related diagnosis (RD: adds information to PD) and secondary associated diagnosis (SAD: complications and co-morbidities potentially affecting the course or cost of hospitalization). This database is linked with all reimbursed outpatient care. A wide range of information is available, such as nature and date of visits, procedures or laboratory tests performed by medical and paramedical professionals, and information on reimbursed drug dispensed (drug name, date and quantity). Moreover, the patient's sociodemographic and medical characteristics (i.e., date of birth, town of residence, health insurance coverage, or specific long-term diseases) are provided. A data quality and consistency plan at several levels ensures homogeneous data processing (ref).

Diagnostics and long-term diseases are coded using the 10th revision of the International Statistical Classification of Diseases and Related Health Problems (ICD-10) [1]. Procedures performed both for inpatients or outpatients are coded with the French classification of clinical procedures (CCAM, *Classification commune des actes médicaux*). Laboratory tests are registered with the French nomenclature of procedures (NABM, *nomenclature des actes de biologie médicale*). Drugs are identified through two classification systems: anatomical therapeutic chemical (ATC) and French presentation identification code (CIP, *Code Identifiant de Présentation*) systems.

To select hospitalizations for urinary tract infection (UTI), hospital admissions of adults ( $\geq 18$ -years-old) occurring between Jan 1st, 2015 and Dec 31, 2017 with a UTI code in PD were selected. Infections were identified, and bacteria thereafter, using codes lists established in collaboration with infectious diseases specialists (Table S1). Incident hospitalizations were then selected, by excluding stays with a previous hospitalization with a UTI code filled in PD, RD or SAD within the past 12 months.

B. Table S1: ICD-10 codes used

| Categories                                       | Codes                                       |
|--------------------------------------------------|---------------------------------------------|
| Principal diagnosis of urinary tract infection   |                                             |
| Acute tubulointerstitial nephritis               | N10, N12                                    |
| Pyelonephritis                                   | N11, N11.1                                  |
| Renal and perirenal abscess                      | N13.6, N15.1                                |
| Cystitis                                         | N30.0, N30.9                                |
| Prostatitis                                      | N41.0, N41.2, N41.3                         |
| Due to medical device                            | T83.5                                       |
| During pregnancy                                 | O23.0, O23.1, O23.2, O23.4, O86.2           |
| Unspecified                                      | N39.0                                       |
| Bacteria                                         |                                             |
| <i>Escherichia coli</i>                          | B96.2                                       |
| <i>Klebsiella pneumoniae</i>                     | B96.1                                       |
| <i>Staphylococcus aureus</i>                     | B95.6, A41.0 <sup>a</sup> , U82.10, U82.100 |
| <i>Pseudomonas aeruginosa</i>                    | B96.5                                       |
| Enterococcus                                     | A40.2 <sup>a</sup> , B95.2                  |
| Resistance                                       |                                             |
| Extended-spectrum $\beta$ -lactamase producing   | U822, U822.0                                |
| Methicillin                                      | U82.18, U82.180, U82.10, U82.100            |
| Vancomycin                                       | U83.0, U83.00, U83.1, U83.10                |
| Multiple resistance                              | U83.71, U83.710, U83.7, U83.78, U83.780     |
| Emerging highly resistant gram-negative bacteria | U83.70, U83.700                             |
| Other $\beta$ -lactams <sup>b</sup>              | U82.8, U82.80, U82.9, U82.90                |
| Others <sup>c</sup>                              | U83.8, U83.80, U83.9, U83.90                |

<sup>a</sup> When associated with a sepsis code, urinary tract infection bacteria was considered the same as that recorded for sepsis.

<sup>b</sup> not included: penicillin

<sup>c</sup> not included: penicillin and quinolone

C. Table S2: Selected bacteria included and associated resistance markers

|                                     | <i>E. coli</i> | <i>K. pneumoniae</i> | <i>S. aureus</i> | <i>P. aeruginosa</i> | Enterococcus |
|-------------------------------------|----------------|----------------------|------------------|----------------------|--------------|
| ESBL-producing                      | ✓              | ✓                    |                  |                      |              |
| Methicillin                         |                |                      | ✓                |                      |              |
| Vancomycin                          |                |                      |                  |                      | ✓            |
| Multiple resistance                 | ✓              | ✓                    | ✓                | ✓                    | ✓            |
| Emerging highly resistant bacteria  |                |                      |                  |                      | ✓            |
| Other $\beta$ -lactams <sup>a</sup> |                |                      |                  | ✓                    |              |
| Others <sup>b</sup>                 |                |                      |                  | ✓                    |              |

*E. coli* = *Escherichia coli*; *K. pneumoniae* = *Klebsiella pneumoniae*; *S. aureus* = *Staphylococcus aureus*; *P. aeruginosa* = *Pseudomonas aeruginosa*; ESBL-producing = Extended Spectrum Beta Lactamase producing

<sup>a</sup> not included: penicillins

<sup>b</sup> not included: penicillins and quinolones

#### D. Supplement S2: Algorithms for identification of risk factors

##### 1. Antibiotic exposure

Antibiotic exposures were extracted from the outpatient healthcare claims database, according to the ATC code list (Table S3). In order to exclude antibiotics prescribed for the index UTI, dispensing during the 7 days before hospitalization were not considered. The time interval between antibiotic dispensing and index stay (at least one dispensing in the 8 days - 3 months; > 3 months) and the number of dispensing during the last 12 months (0; 1; 2;  $\geq 3$ ) were considered. Because of collinearity between the number of antibiotic dispensing and time interval, a variable combining the two information was created. The last dispensing was given particular attention. Because antibiotic consumption may be associated with an outpatient UTI, and broad spectrum antibiotics may favor the selection of antibiotic-resistant bacteria [2–4], four classes of exposures were considered: associated or not with an UTI, and narrow or broad spectrum antibiotic (spectrum detailed in Table S3). If several antibiotics were delivered simultaneously, the broadest spectrum was considered.

##### 2. Non-hospitalized urinary tract infection

An antecedent of non-hospitalized urinary tract infection was defined by:

- a dispensing of an antibiotic specific to urinary tract infection (CIP codes)
- and/or cytobacteriological examination of urine (NABM codes) followed by an antibiotic dispensing ( $\leq 72$ h),
- and/or cytobacteriological examination of urine, followed by an antibiotic susceptibility test (NABM codes) ( $\leq 48$ h).

Recurrent UTIs was defined as  $\geq 3$  UTIs within the last 12 months.

Corresponding codes are shown Table S2.

##### 3. Specific urinary tract disease

Prior hospitalization for a *urinary tract or renal disease* in the previous 12 months, such as kidney failure, bladder tumor, or urinary stone were defined from their respective ICD-10 codes (Table S3).

##### 4. Urinary tract surgical procedures

*Urinary tract surgical procedures* were identified using a CCAM code list (Annex, Table S3). The most recent procedure was studied, and classified according to two characteristics: anatomical location (nearby or in contact with urinary tract), and time interval to the index hospitalization ( $\leq 3$ , 3-12 months).

### 5. Diabetes

A diabetic patient was defined, according to the French National Health Insurance Agency (*Cnam*) algorithm [5,6] as:

- Having received at least 3 dispensing (on different dates) of oral antidiabetic drugs or insulin during the last 12 months,
- and/or registered as diabetic for long-term condition with ICD-10 codes,
- and/or having been hospitalized with a ICD-code of diabetes (as PD or RD),
- and/or having been hospitalized for a complication of diabetes (as PD or RD) with a diabetes code.

ICD-10 codes of identification:

*diabetes codes:* E10, E11, E12, E13, E14

*complication codes:* G59.0, G63.2, G73.0, G99.0, H28.0, H36.0, I79.2, L97, M14.2, M14.6, N08.3

### 6. Immunosuppression

An immunocompromised person was defined as a patient:

- with HIV or AIDS,
- and/or using immunosuppressive treatments,
- and/or with an active cancer,
- and/or using corticoids, with at least 3 dispensing of 20mg/day of prednisolone equivalent during the last 6 months.

Immunosuppressive treatments and corticoids list are available in Table S2. HIV or AIDS and active cancer were identified using French National Health Insurance algorithms, as detailed below.

#### a. HIV or AIDS

According to *Cnam* algorithm [6], a patient was diagnosed with HIV or AIDS when:

- registered for long-term condition with ICD-10 codes of diseases due to HIV/AIDS,
- and/or hospitalized in MCO (medicine, surgery or obstetrics) in PD, RD, or DAS, for HIV/AIDS in the past 2 years,
- and/or hospitalized in MCO during the past 12 months for another diagnosis, with HIV/AIDS as complication or associated morbidity,
- and/or has received at least 3 delivery of at least one drug specific to HIV/AIDS treatment, during the past 12 months,

- and/or has had a medical laboratory procedure specific to the treatment of HIV/AIDS in the past 12 months.

Identification codes:

*ICD-10 HIV/AIDS codes:* B20, B21, B22, B23, B24, F02.4, Z21

*Drug ATC codes:* J05AF01, J05AF02, J05AF03, J05AF04, J05AF06, J05AF13, J05AG01, J05AG03, J05AG04, J05AG05, J05AR01, J05AR02, J05AR04, J05AE01, J05AE02, J05AE03, J05AE04, J05AE05, J05AE07, J05AE08, J05AE09, J05AE10, J05AR10, J05AR06, J05AR08, J05AR09, J05AR13, J05AR18, J05AX07, J05AX08, J05AX09, J05AX12.

*Medical laboratory procedure codes:* 0805, 0806, 4117, 4122

*b. Active cancer*

According to *Cnam* algorithm [6], a patient is diagnosed with an active cancer when:

- registered for long-term condition with ICD-10 codes of cancer,
- and/or having been hospitalized for cancer during the last 12 months (PD or RD)

For breast cancer, only women are selected, with ICD-10 codes C50 and D05.

For prostate cancer, only men are selected, with ICD-10 codes C61 and D07.5 for hospitalization and/or men aged 40 or more with at least 3 anti-androgenic drug dispensing.

Identification codes:

*ICD-10 codes:* all ICD-codes beginning with the letter “C” and from D00 to D09

*Anti-androgenic drugs ATC codes:* L01CD04, L02BX03, L02BX02, L02BB01, L02BB02, L02BB03, L02BB04, L02AE01, L02AE02, L02AE02, L02AE04, G03HA01, L01XX11, L02AA01



7. Pregnancy

According to Cnam algorithm [6], a woman was considered as pregnant when aged between 15 and 49 years and hospitalized (in MCO) with a GHM (homogeneous group of patients) code corresponding to delivery or cesarean section within the 9 months following the index hospitalization.

CHM codes : 14C03, 14C06, 14C07, 14C08, 14Z09, 14Z10, 14Z11, 14Z12, 14Z13, 14Z14

8. Previous hospitalization in intensive care unit (ICU)

ICU stays > 7 days occurring within the 3 months preceding the index hospitalization were identified for HCAI.

E. Table S3: Code list for definition of potential risk factors

|                                                           | Codes                                                                                                                                                                                                                                                                                                                                                                                                                                                                                                                                                                                                                                                                                                                                                                                                                                                                                                                                 |
|-----------------------------------------------------------|---------------------------------------------------------------------------------------------------------------------------------------------------------------------------------------------------------------------------------------------------------------------------------------------------------------------------------------------------------------------------------------------------------------------------------------------------------------------------------------------------------------------------------------------------------------------------------------------------------------------------------------------------------------------------------------------------------------------------------------------------------------------------------------------------------------------------------------------------------------------------------------------------------------------------------------|
| Antibiotics <sup>a</sup> (narrow spectrum indicated by *) |                                                                                                                                                                                                                                                                                                                                                                                                                                                                                                                                                                                                                                                                                                                                                                                                                                                                                                                                       |
| Tetracycline                                              | J01AA02, J01AA04, J01AA05, J01AA08, J01AA12                                                                                                                                                                                                                                                                                                                                                                                                                                                                                                                                                                                                                                                                                                                                                                                                                                                                                           |
| Amphenicols                                               | J01BA02                                                                                                                                                                                                                                                                                                                                                                                                                                                                                                                                                                                                                                                                                                                                                                                                                                                                                                                               |
| Beta-lactams and penicillin                               | J01CA01, J01CA02, J01CA04, J01CA06, J01CA08, J01CA10, J01CA12, J01CA13, J01CA17, J01CE01*, J01CE02*, J01CE08*, J01CE10*, J01CF02*, J01CF04*, J01CG01, J01CR01, J01CR02, J01CR03, J01CR05                                                                                                                                                                                                                                                                                                                                                                                                                                                                                                                                                                                                                                                                                                                                              |
| Other beta-lactams                                        | J01DB01, J01DB04, J01DB05, J01DB09, J01DC02, J01DC04, J01DC07, J01DD02, J01DD04, J01DD08, J01DD13, J01DE01, J01DF01*, J01DH02, J01DH03, J01DH51, J01DI01, J01DI02, J01DI54                                                                                                                                                                                                                                                                                                                                                                                                                                                                                                                                                                                                                                                                                                                                                            |
| Sulfonamides and trimethoprim                             | J01EA01, J01EB02, J01EC02, J01EE01                                                                                                                                                                                                                                                                                                                                                                                                                                                                                                                                                                                                                                                                                                                                                                                                                                                                                                    |
| Macrolides, Lincosamides, Streptogramins                  | J01FA01*, J01FA02*, J01FA03*, J01FA06*, J01FA07*, J01FA09*, J01FA10*, J01FA11*, J01FA15*, J01FF01*, J01FF02*, J01FG01*                                                                                                                                                                                                                                                                                                                                                                                                                                                                                                                                                                                                                                                                                                                                                                                                                |
| Aminoglycoside                                            | J01GA01, J01GB01, J01GB03, J01GB06                                                                                                                                                                                                                                                                                                                                                                                                                                                                                                                                                                                                                                                                                                                                                                                                                                                                                                    |
| Quinolone                                                 | J01MA01, J01MA02, J01MA03, J01MA04, J01MA06, J01MA07, J01MA12, J01MA14, J01MB04*, J01MB07*                                                                                                                                                                                                                                                                                                                                                                                                                                                                                                                                                                                                                                                                                                                                                                                                                                            |
| Association of antibacterial                              | J01RA02, J01RA04                                                                                                                                                                                                                                                                                                                                                                                                                                                                                                                                                                                                                                                                                                                                                                                                                                                                                                                      |
| Other antibacterial                                       | J01XA01*, J01XA02*, J01XA04*, J01XB01*, J01XC01, J01XD01, J01XD02, J01XD03, J01XE01, J01XX01, J01XX04*, J01XX08*, J01XX09*, J01XX11*                                                                                                                                                                                                                                                                                                                                                                                                                                                                                                                                                                                                                                                                                                                                                                                                  |
| Antecedent of UTI algorithm                               |                                                                                                                                                                                                                                                                                                                                                                                                                                                                                                                                                                                                                                                                                                                                                                                                                                                                                                                                       |
| Antibiotics specific to UTI <sup>b</sup>                  | 3400933652395, 3400937374392, 3400939418261, 3400939423524, 3400939463506, 3400939423692, 3400949879311, 3400939423814, 3400939889115, 3400939889054, 3400939889405, 3400939889344, 3400949879250, 3400933209230, 3400949009824, 3400949000524, 3400949006861, 3400949003501, 3400933282387, 3400933459758, 3400933912482, 3400932982530, 3400930057728, 3400932441396, 3400937993050, 3400959069757, 3400931226208, 3400932964499, 3400955368632, 3400930419045, 3400932180011, 3400936267114, 3400956502929, 3400936133419, 3400936266971, 3400936125483, 3400936267343, 3400936267282, 3400937465335, 3400936125544, 3400936797420, 3400936267053, 3400936747104, 3400933085728, 3400955454830, 3400933089221                                                                                                                                                                                                                      |
| Cytobacteriological examination of urine <sup>c</sup>     | 5201                                                                                                                                                                                                                                                                                                                                                                                                                                                                                                                                                                                                                                                                                                                                                                                                                                                                                                                                  |
| Antibiogram <sup>c</sup>                                  | 0269, 0270                                                                                                                                                                                                                                                                                                                                                                                                                                                                                                                                                                                                                                                                                                                                                                                                                                                                                                                            |
| Urinary tract disease <sup>d</sup>                        | A18.1, A54, A54.0-2, A55, A56, A56.0-3, A57-63.8, B90.1, C51-58, C60-60.2, C62-63.9, C64-68.9, D07.1-07.4, D07.6, D28-28.9, D29.0, D29.1, D29.3, D29.7, D30-30.9, D39.7, D39.9, D40, D40.0, D40.7, D40.9, D41-41.9, N04-04.9, N06-06.8, N11, N11.8-11.9, N13-14.4, N15, N15.0, N15.8-16.8, N17-23, N25, N25.8-25.9, N26-30.8, N31-42.9, N45-45.9, N48.1, N49.0-49.1, N50.9, N51.0, N51.8, N70-77.8, N80, N81-82.9, N84, N84.2-84.9, N99, N99.1, N99.5, N99.8-99.9, O23.5, O23.9, O75.3, O85-86.1, O86.3, O04.5, O05.0, O05.5, O06.5, O07.0, O07.5, O90.4, R31-35, R39-39.1                                                                                                                                                                                                                                                                                                                                                            |
| Procedures <sup>e</sup>                                   |                                                                                                                                                                                                                                                                                                                                                                                                                                                                                                                                                                                                                                                                                                                                                                                                                                                                                                                                       |
| On urinary tract                                          | HJEA001, JACA001-002, JACH001-003, JADA001, JAEA002-003, JAJA001-032, JAF001-008, JAF010, JAF019, JAGA001-006, JAGC001, JAGD001, JAGD002, JAGF001-003, JAHA001, JAHB001, JAH001, JAHH001-002, JAHJ002, JAHJ004-007, JAKD001, JAMA001-002, JAMB001, JANE002, JANE005, JANH001-002, JANJ002, JANM001-002, JAPA001, JAPC018, JAQH003, JASA001, JBCA001, JBFA001-002, JBFC001, JBFE001, JBHE001, JBMA001, JBMC001, JBNE004, JBPE001-002, JBPG001, JBPH001, JBQE001, JBQG001-002, JBQH001-003, JCAD001, JCAE001, JCAF001, JCAH001, JCCA002-003, JCCA005-014, JCCB001, JCCC001-003, JCCC003, JCEA001-0006, JCEC011, JCEE001, JCFA001-010, JCFC001, JCFD001, JCFE001-003, JCFF001, JCGA001-003, JCGC001-003, JCGE001-006, JCGG001, JCGH001-005, JCKA001-002, JCKD001, JCKE001-002, JCKH001, JCLD001, JCLE001-004, JCLH001, JCMA001-005, JCND001, JCNE001, JCNE002-004, JCNF001, JCNM001-002, JCPA001-003, JCPC001-002, JCPD001, JCPE001-002, |

---

|                                          |                                                                                                                                                                                                                                                                                                                                                                                                                                                                                                                                                                                                                                                                                                                                                                                                                                                                                                                                                                                                                                                                                                                                                            |
|------------------------------------------|------------------------------------------------------------------------------------------------------------------------------------------------------------------------------------------------------------------------------------------------------------------------------------------------------------------------------------------------------------------------------------------------------------------------------------------------------------------------------------------------------------------------------------------------------------------------------------------------------------------------------------------------------------------------------------------------------------------------------------------------------------------------------------------------------------------------------------------------------------------------------------------------------------------------------------------------------------------------------------------------------------------------------------------------------------------------------------------------------------------------------------------------------------|
|                                          | JCQE001-004, JCSA001-005, JDAD001, JDCA001-004, JDCC016, JDCJ001, JDDA002-008, JDDDB005, JDDDB007, JDDC002, JDFA001-025, JDFC001, JDFC023, JDFE001-003, JDGE001, JDHE001-003, JDJD001-002, JDJE001, JDKD001-002, JDLA001, JDLD001-002, JDLE332, JDLF001, JDMA001-003, JDNE001, JDNM001, JDPA001-002, JDPE001-002, JDQD001-006, JDQD008-009, JDQE001-003, JDQF001-002, JDQH001-003, JDSA001-011, JDSC024, JEAA001, JEAD001, JEAH001, JECA001-002, JECE001, JEEE001, JEFA001-012, JEFE001, JEFE003-005, JEGA002-005, JEGB005, JEGE001-004, JEHD001, JEHE001-002, JEKA002, JEKA005-010, JEKB006, JEKE001, JELA001-004, JELB003, JELD001, JELE001-003, JEMA001-007, JEMA009-023, JENE001, JEP A001, JEP A006-007, JEPD001-002, JEPE001-002, JEPH001, JEQD001, JEQD002, JESA001, JESA003-005, JFFA001-005, JFFA008-09, JFFA011, JFFA013, JFFA016, JFFA018, JFFA019, JFFA022, JGFA005-007, JGFA009, JGFA011, JGFA014, JGFA016, JGFA016, JGFC001, JGFE004, JGFE023, JGFE365, JGHB001-002, JGHD001, JGHJ001-002, JGJB001-003, JGNE171, JGNJ900, JHQB001, JHQP002, JMBA001, JMBA001, JRGA001-004, JRGC001, JRPA001, JRQD001, JRQP001, JRRD001, JZMA002-002, JZQD001 |
| Proximity to urinary tract               | HJMA001, HKEA001, HKMA006, HKPA006, HPQC001, JFFA012, JFFC001, JGFA008, JGFC045, JGQH001, JGQH003, JGQH004, JHAA001-005, JHBA001, JHCA001-002, JHCA004-006, JHDA001, JHEA001-012, JHEP001-002, JHFA001-019, JHFC001, JHGA00-003, JHJA001, JHJB001-003, JHKA002-004, JHLA001-005, JHLB001-002, JHMA001-008, JHMB001, JHNP001, JHPA001-003, JHQH001, JHSA001-002, JHSB001, JJCC002, JJLE001-002, JJQC001, JKBA001, JKFA002, JKFA005-008, JKFA011, JKFA018, JKFA020-021, JKFA023, JKFA025-026, JKFA030-031, JKFA033, JKFD001-002, JKFE001-003, JKGD002, JKGE002, JKND001-004, JKNE001, JKPC001, JKPD002, JKPE001-002, JKPJ001-002, JKQE001-002, JLAD001, JLCA003, JLCA005-009, JLDA002, JLFA001-002, JLFA004, JLFD001-002, JLGD001, JLGE001, JLJA002, JLJB001, JLJD001, JLLD001, JLMA001-005, JLMC001, JLMD001, JLND001-002, JLPA001, JLQE001-002, JLSD001, JMCA001-006, JMEA001-002, JMFA001-010, JMMA001-002, JMMA004-005, JMPA001-005, JMPP001, JMQP001, JZMA001                                                                                                                                                                                           |
| Immunosuppression algorithm              |                                                                                                                                                                                                                                                                                                                                                                                                                                                                                                                                                                                                                                                                                                                                                                                                                                                                                                                                                                                                                                                                                                                                                            |
| immunosuppressive treatment <sup>a</sup> | L04, L01A, L01B, L01C, L01D, L01X, L03AB, J05AE01, J05AE02, J05AE03, J05AE04, J05AE05, J05AE06, J05AE07, J05AE08, J05AE09, J05AE10, J05AF01, J05AF02, J05AF03, J05AF04, J05AF06, J05AF13, J05AG01, J05AG03, J05AG04, J05AG05, J05AR01, J05AR02, J05AR04, J05AR06, J05AR08, J05AR09, J05AR13, J05AR18, J05AX07, J05AX08, J05AX09, J05AX12,                                                                                                                                                                                                                                                                                                                                                                                                                                                                                                                                                                                                                                                                                                                                                                                                                  |
| Corticosteroids <sup>a</sup>             | H02AB01, H02AB02, H02AB04, H02AB06, H02AB07, H02AB08, H02AB09, H02AB10                                                                                                                                                                                                                                                                                                                                                                                                                                                                                                                                                                                                                                                                                                                                                                                                                                                                                                                                                                                                                                                                                     |

---

UTI = Urinary tract infection

<sup>a</sup> ATC code: Anatomical Therapeutic Chemical code

<sup>b</sup> CIP code: Presentation identification code, unique national drug specialty registration code

<sup>c</sup> NABM code: French nomenclature of clinical pathology procedures code

<sup>d</sup> ICD-10 code: International Classification of Diseases 10th Revision

<sup>e</sup> CCAM code: French medical classification of clinical procedures

F. Table S4: Conditional univariate logistic regression: Risk factors of having a community-acquired or healthcare-associated urinary tract infection caused by a resistant bacterium compared with a susceptible one, by gender.

|                                            | Community-acquired infections |                                | Healthcare-associated infections |                                |
|--------------------------------------------|-------------------------------|--------------------------------|----------------------------------|--------------------------------|
|                                            | Men (N=5268)<br>ORc [CI 95%]  | Women (N=7668)<br>ORc [CI 95%] | Men (N=3170)<br>ORc [CI 95%]     | Women (N=2540)<br>ORc [CI 95%] |
| <i>Antibiotic consumption<sup>a</sup></i>  |                               |                                |                                  |                                |
| <i>Number of antibiotic dispensing</i>     |                               |                                |                                  |                                |
| 0                                          | 1                             | 1                              | 1                                | 1                              |
| 1                                          | 1.14 [0.97 – 1.33]            | 1.13 [0.99 – 1.29]             | 1.09 [0.88 – 1.34]               | 1.17 [0.93 – 1.48]             |
| 2                                          | 1.42 [1.19 – 1.70]            | 1.44 [1.24 – 1.67]             | 1.12 [0.91 – 1.39]               | 1.32 [1.03 – 1.70]             |
| ≥ 3                                        | 2.48 [2.15 – 2.87]            | 2.04 [1.81 – 2.29]             | 1.87 [1.55 – 2.26]               | 1.66 [1.36 – 2.03]             |
| <i>Delay between dispensing and stay</i>   |                               |                                |                                  |                                |
| no dispensing, or ≤ 7 days                 | 1                             | 1                              | 1                                | 1                              |
| 8 – 90 days                                | 2.43 [2.12 – 2.79]            | 2.03 [1.82 – 2.30]             | 1.70 [1.43 – 2.02]               | 1.68 [1.39 – 2.04]             |
| > 90 days                                  | 1.00 [0.85 – 1.16]            | 1.13 [1.00 – 1.28]             | 0.96 [0.79 – 1.16]               | 1.11 [0.90 – 1.37]             |
| <i>Urinary tract condition</i>             |                               |                                |                                  |                                |
| <i>Surgical procedure<sup>a</sup></i>      |                               |                                |                                  |                                |
| No                                         | 1                             | 1                              | 1                                | 1                              |
| On urinary tract                           | 1.46 [1.26 – 1.70]            | 1.36 [1.13 – 1.65]             | 1.16 [1.00 – 1.34]               | 1.63 [1.31 – 2.03]             |
| Nearby urinary tract                       | 1.20 [0.46 – 3.13]            | 0.87 [0.60 – 1.26]             | 0.72 [0.23 – 2.27]               | 0.78 [0.44 – 1.39]             |
| <i>Delay between procedures and stay</i>   |                               |                                |                                  |                                |
| No procedure                               | 1                             | 1                              | 1                                | 1                              |
| ≤ 3 months                                 | 1.70 [1.40 - 2.05]            | 1.27 [0.94 - 1.73]             | 1.12 [0.96 – 1.31]               | 1.75 [1.39 - 2.20]             |
| > 3 months                                 | 1.22 [1.00 – 1.50]            | 1.24 [1.02 – 1.51]             | 1.28 [0.96 - 1.69]               | 0.96 [0.66 - 1.37]             |
| <i>Prior ICU stay in the last 3 months</i> |                               |                                |                                  |                                |
| No stay                                    |                               |                                | 1                                | 1                              |
| 1 or 2 days                                |                               |                                | 1.08 [0.80 - 1.45]               | 1.28 [0.88 - 1.89]             |
| 3 - 7 days                                 |                               |                                | 1.22 [0.94 - 1.59]               | 1.16 [0.82 - 1.62]             |
| > 7 days                                   |                               |                                | 1.71 [1.20 - 2.45]               | 1.79 [1.03 - 3.10]             |

ORc = Crude OR; CI 95%, 95% confidence interval, ICU = intensive care unit

<sup>a</sup>In the past 12 months

G. Table S5. Number of antibiotic dispensing during the previous 3 months

| <i>Antibiotic class</i>         | Community-acquired |      |       |      | Hospital-acquired |      |       |      |
|---------------------------------|--------------------|------|-------|------|-------------------|------|-------|------|
|                                 | Men                |      | Women |      | Men               |      | Women |      |
|                                 | Mean               | SD   | Mean  | SD   | Mean              | SD   | Mean  | SD   |
| Broad spectrum penicillin (BSP) | 1.18               | 0.51 | 1.15  | 0.44 | 1.24              | 0.59 | 1.22  | 0.52 |
| Sulfonamide                     | 1.45               | 0.71 | 1.51  | 0.75 | 1.47              | 0.76 | 1.40  | 0.74 |
| Cephalosporin                   | 1.24               | 0.51 | 1.17  | 0.46 | 1.17              | 0.42 | 1.28  | 0.60 |
| Macrolide                       | 1.23               | 0.51 | 1.16  | 0.41 | 1.17              | 0.31 | 1.25  | 0.53 |
| Quinolone                       | 1.26               | 0.53 | 1.19  | 0.51 | 1.27              | 0.56 | 1.13  | 0.37 |
| Other antibiotics               | 1.74               | 1.21 | 1.42  | 0.79 | 1.20              | 0.47 | 1.42  | 0.78 |
| Cephalosporin and BSP           | 2.58               | 0.63 | 2.41  | 0.72 | 2.43              | 0.73 | 2.65  | 1.29 |
| Quinolone and BSP               | 2.48               | 0.86 | 2.61  | 0.89 | 2.56              | 0.87 | 2.52  | 0.89 |
| Quinolone and cephalosporin     | 2.64               | 0.71 | 2.48  | 0.83 | 2.63              | 1.08 | 2.50  | 0.86 |

When two classes of antibiotics were dispensed in the 3 months, each antibiotic class counted for one dispensing, even if the two antibiotics were delivered at the same time. The minimum number in this case is 2.

H. Table S6. Characteristics of patients excluded and included for analysis of association between antibiotic classes and resistant-bacterial acquisition

|                                                            | Community-acquired   |       |                      |       |                      |       |                      |       | Hospital-acquired   |       |                      |       |                     |       |                      |       |
|------------------------------------------------------------|----------------------|-------|----------------------|-------|----------------------|-------|----------------------|-------|---------------------|-------|----------------------|-------|---------------------|-------|----------------------|-------|
|                                                            | Men                  |       |                      |       | Women                |       |                      |       | Men                 |       |                      |       | Women               |       |                      |       |
|                                                            | Excluded<br>(N=1240) |       | Included<br>(N=4028) |       | Excluded<br>(N=1804) |       | Included<br>(N=5864) |       | Excluded<br>(N=886) |       | Included<br>(N=2284) |       | Excluded<br>(N=656) |       | Included<br>(N=1884) |       |
|                                                            | N                    | %     | N                    | %     | N                    | %     | N                    | %     | N                   | %     | N                    | %     | N                   | %     | N                    | %     |
| Age (years)                                                |                      |       |                      |       |                      |       |                      |       |                     |       |                      |       |                     |       |                      |       |
| Mean (SD)                                                  | 69.6                 | 15.2  | 71.4                 | 15.2  | 67.0                 | 20.7  | 67.9                 | 22.4  | 72.8                | 13.1  | 75.8                 | 12.4  | 71.9                | 17.4  | 75.2                 | 17.3  |
| Median (IQ)                                                | 72.0                 | 21.0  | 73.0                 | 20.0  | 72.0                 | 30.0  | 75.0                 | 33.0  | 74.0                | 18.0  | 78.0                 | 17.0  | 75                  | 22    | 80.0                 | 21.0  |
| Diagnostic                                                 |                      |       |                      |       |                      |       |                      |       |                     |       |                      |       |                     |       |                      |       |
| Tubulo-interstitial nephritis                              | 150                  | 12.10 | 586                  | 14.55 | 1018                 | 56.43 | 3684                 | 63.27 | 142                 | 16.03 | 390                  | 17.08 | 318                 | 48.48 | 1036                 | 54.99 |
| Pyelonephritis                                             | 6                    | 0.48  | 40                   | 0.99  | 32                   | 1.77  | 152                  | 2.60  | 6                   | 0.68  | 14                   | 0.61  | 24                  | 3.66  | 42                   | 2.23  |
| Renal and perirenal abscess                                | 22                   | 1.77  | 88                   | 2.18  | 56                   | 3.10  | 216                  | 3.63  | 26                  | 2.93  | 52                   | 2.28  | 22                  | 3.35  | 56                   | 2.97  |
| Cystitis                                                   | 58                   | 4.68  | 132                  | 3.28  | 214                  | 11.86 | 504                  | 8.19  | 50                  | 5.64  | 132                  | 5.78  | 90                  | 13.72 | 212                  | 11.25 |
| Unspecified UTI                                            | 280                  | 22.58 | 774                  | 19.22 | 438                  | 24.28 | 1154                 | 19.70 | 284                 | 32.05 | 680                  | 29.77 | 192                 | 29.27 | 508                  | 26.96 |
| Prostatitis                                                | 714                  | 57.58 | 2380                 | 59.09 | 0                    | 0.00  | 0                    | 0.00  | 368                 | 41.53 | 982                  | 43.99 | 0                   | 0.00  | 0                    | 0.00  |
| Due to urinary device                                      | 10                   | 0.81  | 28                   | 0.70  | 4                    | 0.22  | 10                   | 0.17  | 10                  | 1.13  | 34                   | 1.49  | 8                   | 1.22  | 10                   | 0.53  |
| During pregnancy                                           | 0                    | 0.00  | 0                    | 0.00  | 42                   | 2.34  | 136                  | 1.92  | 0                   | 0.00  | 0                    | 0.00  | 2                   | 0.30  | 20                   | 1.17  |
| Bacteria                                                   |                      |       |                      |       |                      |       |                      |       |                     |       |                      |       |                     |       |                      |       |
| <i>Staphylococcus aureus</i>                               | 46                   | 3.71  | 300                  | 7.45  | 36                   | 2.00  | 110                  | 1.88  | 66                  | 7.45  | 236                  | 10.33 | 10                  | 1.52  | 54                   | 2.87  |
| <i>Escherichia coli</i>                                    | 959                  | 76.61 | 3042                 | 75.52 | 1422                 | 78.82 | 5264                 | 89.78 | 494                 | 55.76 | 1280                 | 56.04 | 494                 | 75.30 | 1518                 | 80.57 |
| <i>Klebsiella pneumoniae</i>                               | 188                  | 15.16 | 514                  | 12.76 | 292                  | 16.19 | 406                  | 6.92  | 222                 | 25.06 | 572                  | 25.04 | 124                 | 18.90 | 246                  | 13.06 |
| <i>Pseudomonas aeruginosa</i>                              | 44                   | 3.55  | 120                  | 2.98  | 32                   | 1.77  | 54                   | 0.92  | 76                  | 8.58  | 128                  | 5.60  | 12                  | 2.83  | 42                   | 2.23  |
| <i>Enterococcus</i>                                        | 12                   | 0.97  | 52                   | 1.29  | 22                   | 1.22  | 30                   | 0.51  | 28                  | 3.16  | 68                   | 2.98  | 16                  | 2.44  | 24                   | 1.27  |
| Hospitalization length of stay                             |                      |       |                      |       |                      |       |                      |       |                     |       |                      |       |                     |       |                      |       |
| < 7 days                                                   | 888                  | 71.61 | 2757                 | 68.45 | 1193                 | 66.13 | 3850                 | 66.65 | 573                 | 64.67 | 1328                 | 58.14 | 392                 | 59.76 | 1036                 | 54.99 |
| 7 - 30 days                                                | 343                  | 27.66 | 2135                 | 30.66 | 600                  | 33.26 | 1971                 | 33.61 | 303                 | 34.20 | 914                  | 40.02 | 256                 | 39.02 | 826                  | 43.84 |
| > 30 days                                                  | 9                    | 0.73  | 36                   | 0.89  | 11                   | 0.61  | 43                   | 0.73  | 10                  | 1.13  | 42                   | 1.84  | 8                   | 1.22  | 22                   | 1.17  |
| Number of dispensing in the previous 3 months <sup>1</sup> |                      |       |                      |       |                      |       |                      |       |                     |       |                      |       |                     |       |                      |       |
| Mean (SD)                                                  | 2.55                 | 1.40  | 1.43                 | 0.75  | 2.50                 | 1.39  | 1.35                 | 0.68  | 2.39                | 1.29  | 1.39                 | 0.74  | 2.48                | 1.27  | 1.40                 | 0.74  |
| Median (IQ)                                                | 2.00                 | 2.00  | 1.00                 | 1.00  | 2.00                 | 2.00  | 1.00                 | 1.00  | 2.00                | 2.00  | 1.00                 | 1.00  | 2.00                | 1.00  | 1.00                 | 1.00  |

Excluded patients were patients with several classes of antibiotic delivered during this period (except the three most frequent combinations) or antibiotics rarely dispensed (<1% of studied sample), and their matched patients.

When two classes of antibiotics were dispensed in the 3 months, each antibiotic class counted for one dispensing, even if the two antibiotics were delivered at the same time. The minimum number in this case is 2.

<sup>1</sup> among patients with antibiotic prescription in the previous 3 months

## I. References

- [1] WHO. International Statistical Classification of Diseases and Related Health Problems, 10th Revision (ICD-10). 2nd ed. 2015. <http://apps.who.int/classifications/icd10/browse/2015/en>.
- [2] Yilmaz E, Akalin H, Özbey S, Kordan Y, Sinirtaş M, Gürcüoğlu E, et al. Risk Factors in Community-Acquired/Onset Urinary Tract Infections Due to Extended-Spectrum Beta-Lactamase-Producing *Escherichia coli* and *Klebsiella pneumoniae*. *J Chemother* 2008;20:581–5. <https://doi.org/10.1179/joc.2008.20.5.581>.
- [3] Ena J, Arjona F, Martínez-Peinado C, del mar López-Perezagua M, Amador C. Epidemiology of urinary tract infections caused by extended-spectrum beta-lactamase-producing *Escherichia coli*. *Urology* 2006;68:1169–74. <https://doi.org/10.1016/j.urology.2006.08.1075>.
- [4] Boix-Palop L, Xercavins M, Badía C, Obradors M, Riera M, Freixas N, et al. Emerging extended-spectrum  $\beta$ -lactamase-producing *Klebsiella pneumoniae* causing community-onset urinary tract infections: a case–control–control study. *Int J Antimicrob Agents* 2017;50:197–202. <https://doi.org/10.1016/j.ijantimicag.2017.03.009>.
- [5] Fuentes S, Cosson E, Mandereau-Bruno L, Fagot-Campagna A, Bernillon P, Goldberg M, et al. Identifying diabetes cases in health administrative databases: a validation study based on a large French cohort. *Int J Public Health* 2019;64:441–50. <https://doi.org/10.1007/s00038-018-1186-3>.
- [6] Constantinou P, Tuppin P, Fagot-Campagna A, Gastaldi-Ménager C, Schellevis FG, Pelletier-Fleury N. Two morbidity indices developed in a nationwide population permitted performant outcome-specific severity adjustment. *J Clin Epidemiol* 2018;103:60–70. <https://doi.org/10.1016/j.jclinepi.2018.07.003>.
